# Supplementary material for: Ferromagnetism of three-dimensional graphene framework
Source: Royal Society of Chemistry journal article supplement (doi:10.1039/c5ra14377b), 2015-01-01
Supplement: c5ra14377b1.pdf [file c5ra14377b1.pdf]

## Supporting Information

### Ferromagnetism of three-dimensional graphene framework

Sai Qin<sup>1</sup>, Pingping Sun<sup>1</sup>, Qitao Di<sup>2</sup>, Shuang Zhou<sup>1</sup>, Caiping Yang<sup>1</sup>, and Qingyu Xu<sup>1,3,4\*</sup>

<sup>1</sup> Department of Physics & Key Laboratory of MEMS of the Ministry of Education, Southeast University, Nanjing 211189, China

<sup>2</sup> Department of Materials Science and Engineering, Nanjing University, Nanjing 210008, China

<sup>3</sup> National Laboratory of Solid State Microstructures, Nanjing University, Nanjing 210093, China

<sup>4</sup> Collaborative Innovation Center of Suzhou Nano Science and Technology, Soochow University, Suzhou 215123, China

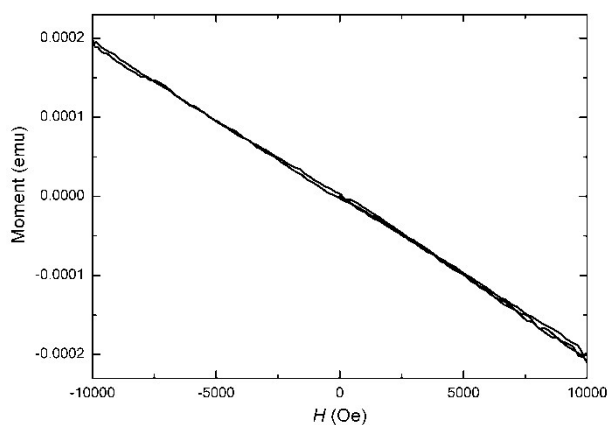

Figure S1 *M-H* curves for the VSM rod and sample holder measured at 300 K, shows the pure diamagnetic background.

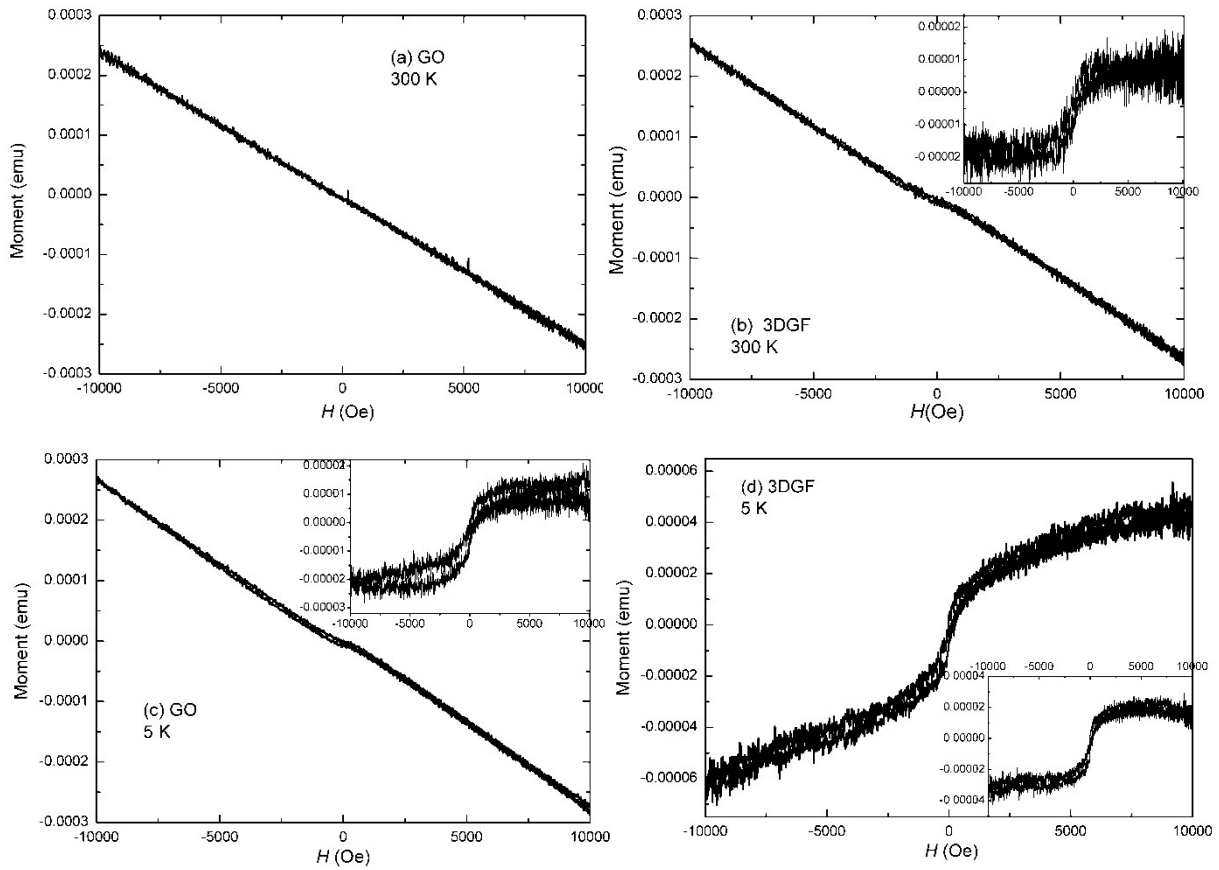

Figure S2 The raw data of the  $M$ - $H$  curves for GO ((a) 300 K and (c) 5 K) and 3DGF ((b) 300 K and (d) 5 K) measured at 300 K. The  $M$ - $H$  curve of GO shows a straight line with negative slope, while S shape can be observed in the  $M$ - $H$  curves of GO at 5 K and 3DGF at 300 K and 5 K. The insets show the ferromagnetic signal after subtracting the high field linear background. The ferromagnetic signals are in the order of  $10^{-5}$  emu, which are large enough for the sensitivity of VSM integrated in PPMS ( $1 \times 10^{-6}$  emu).

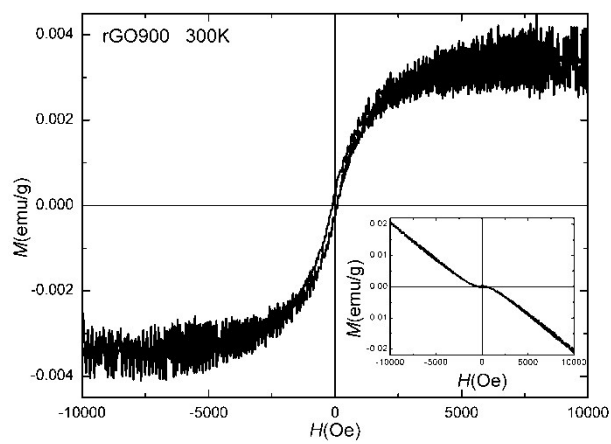

Figure S3  $M$ - $H$  curves for the rGO900 (GO annealed in Ar atmosphere at 900 °C) at 300 K.
